# Supplementary material
Source: publisher figshare collection journal article supplement (https://diabetesjournals.figshare.com/articles/dataset/_/14771181)

**Supplementary Figure S9 -Unprocessed image of western blots presented in supplementary figure S3 for EndoC-BH1 cells (A) and primary human islets (B) and in supplementary figure S8 (C)**

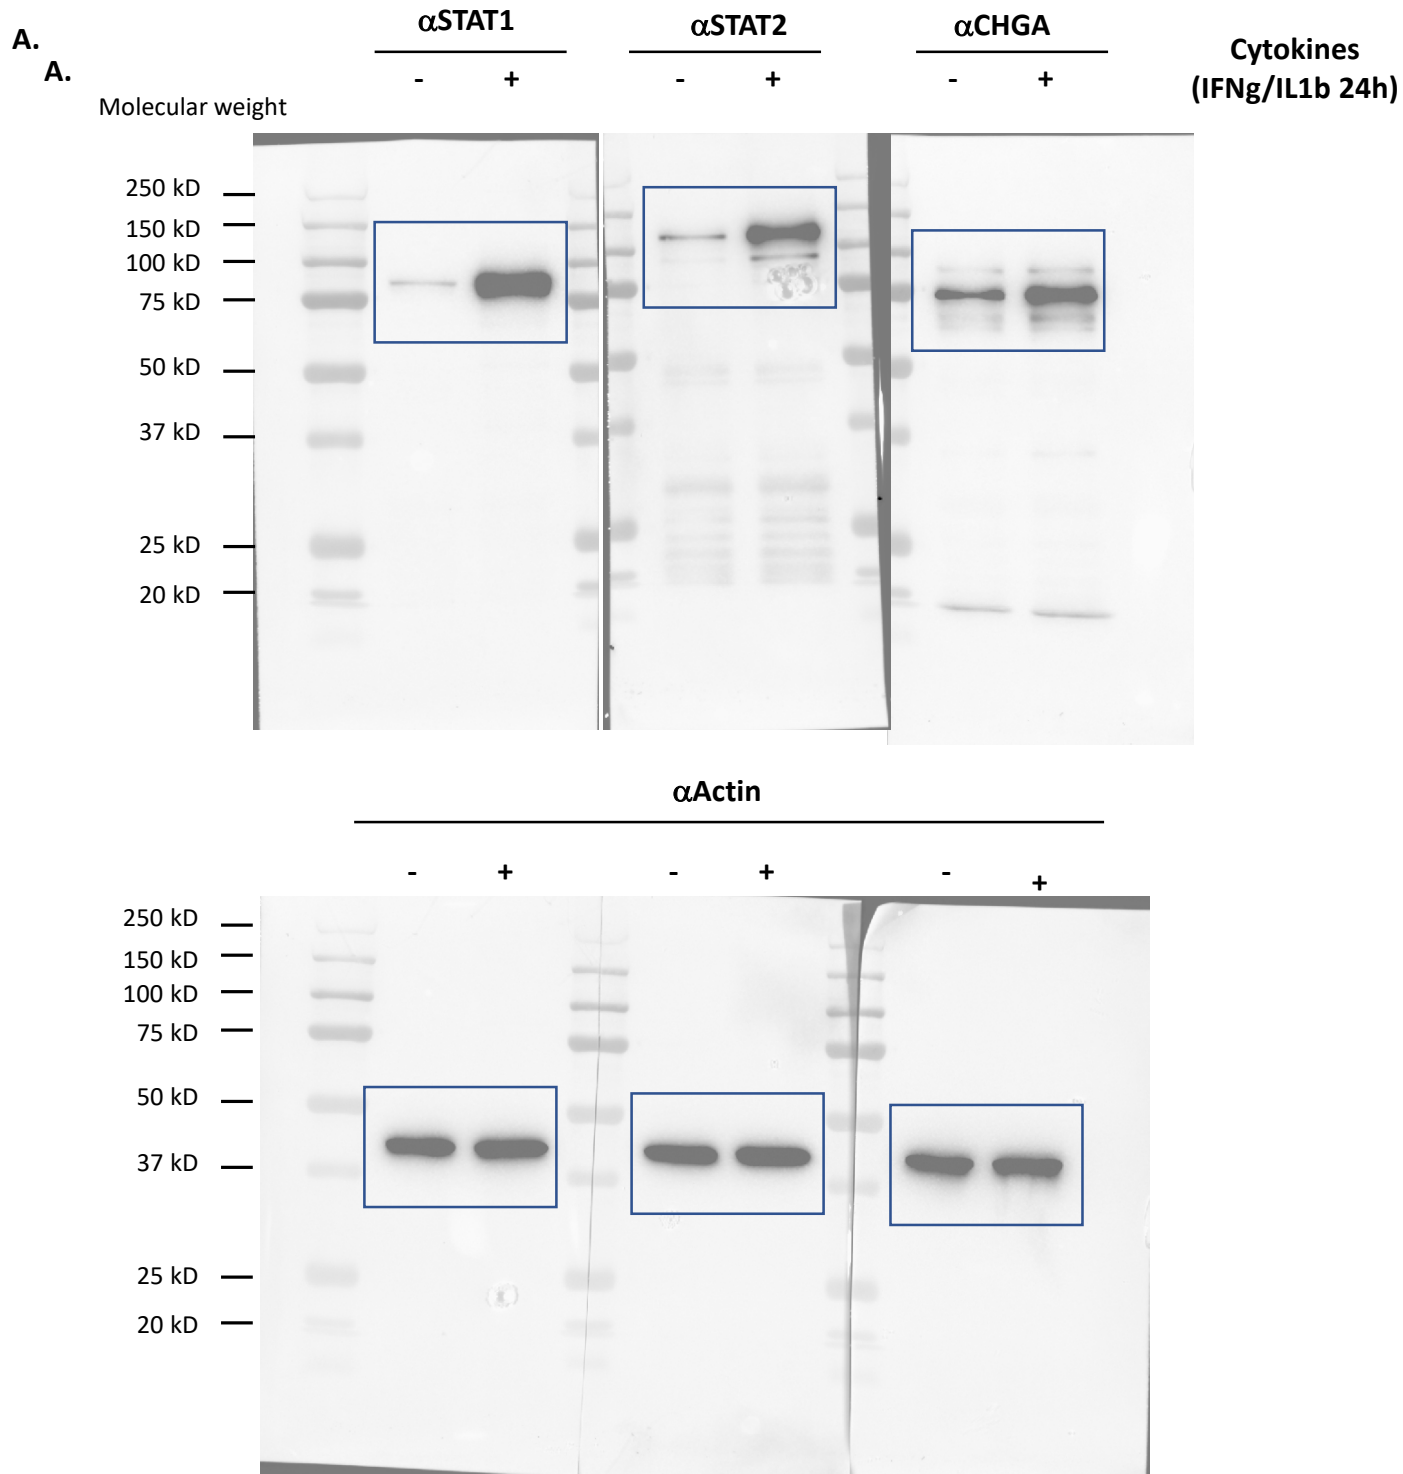

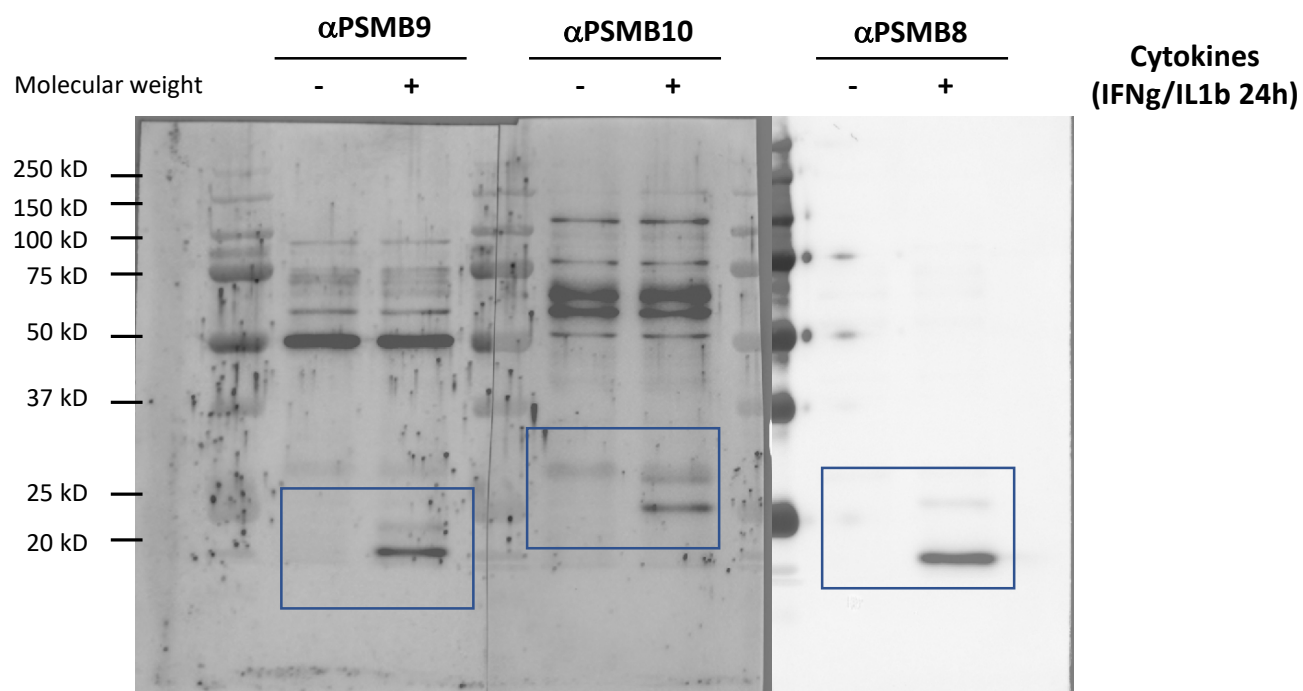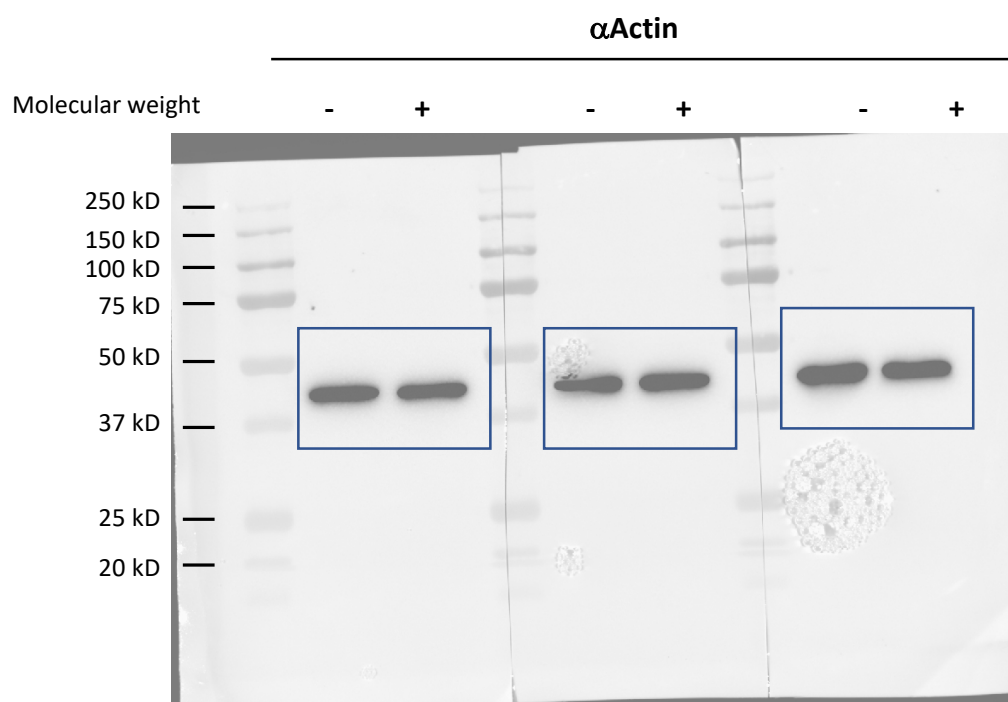

B.

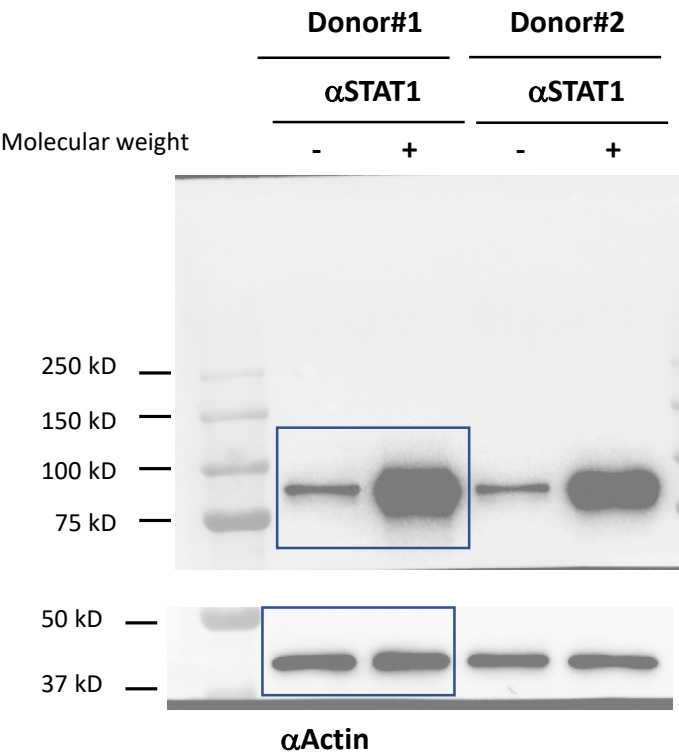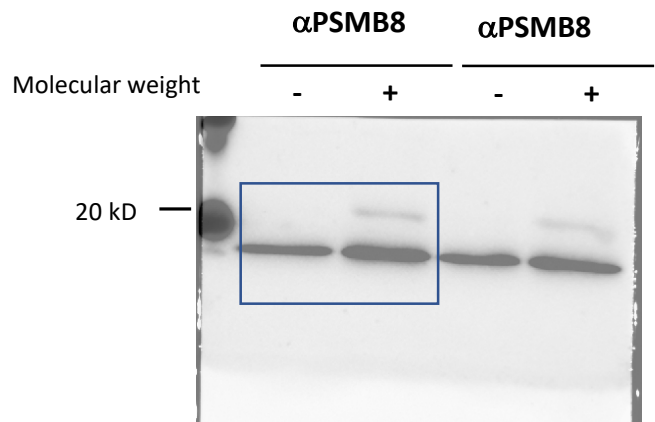

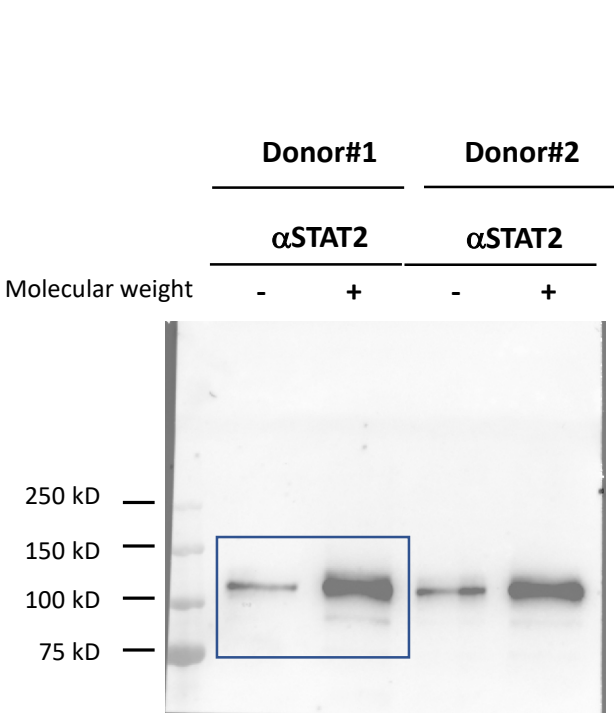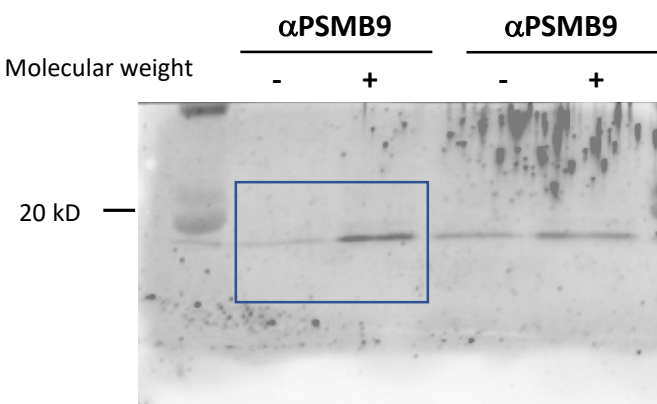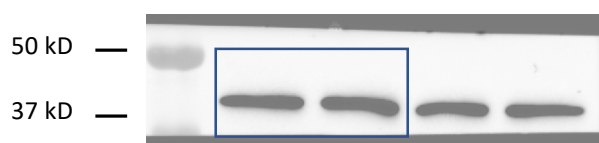

$\alpha$ Actin

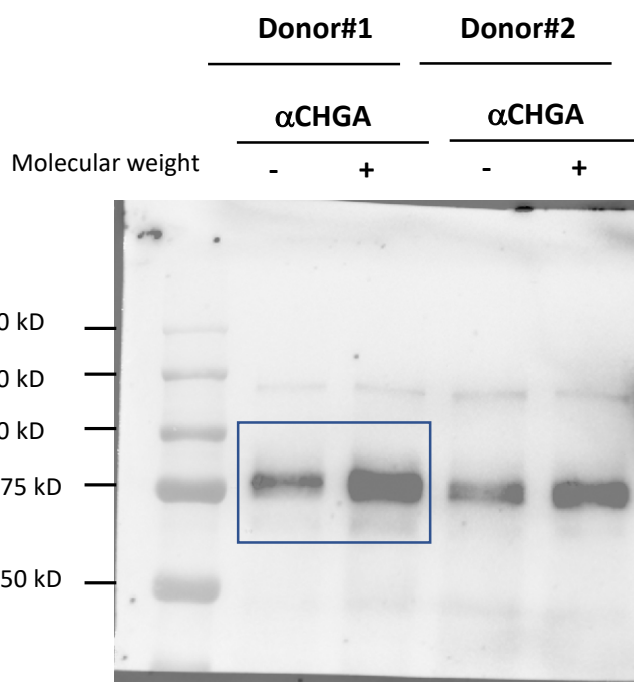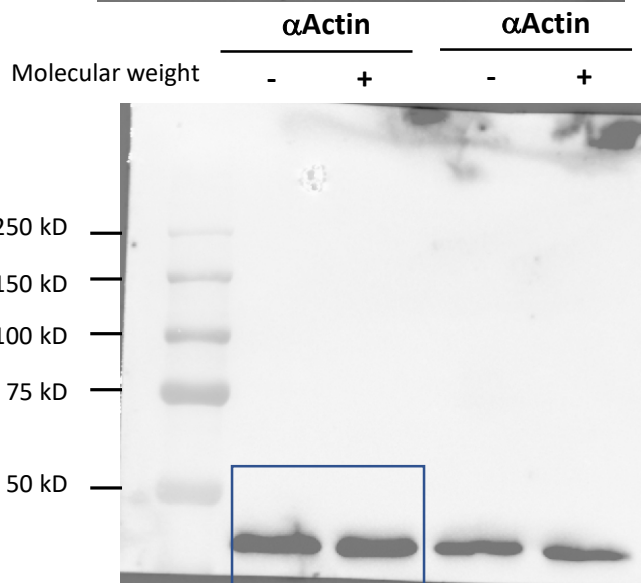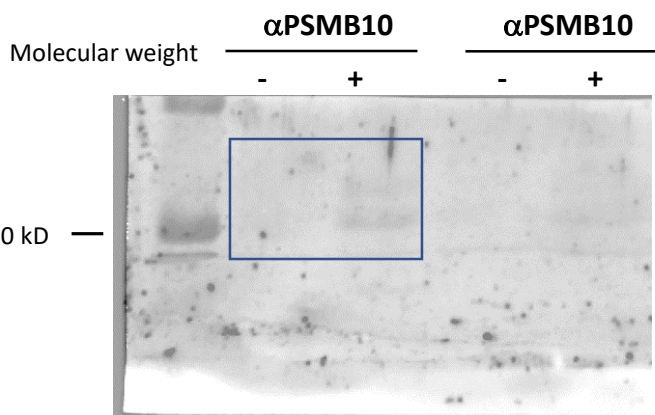

C.

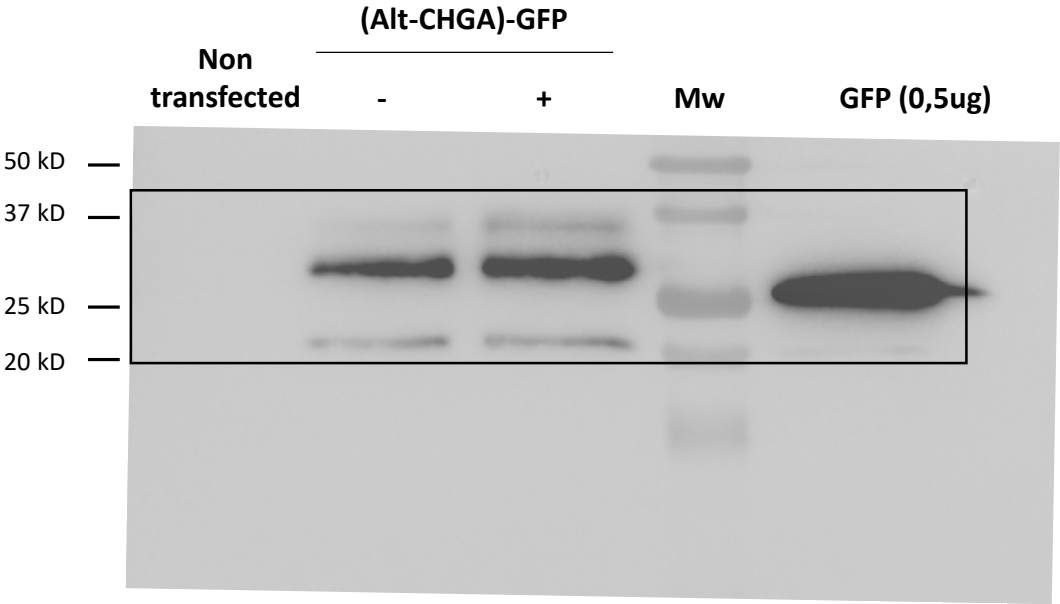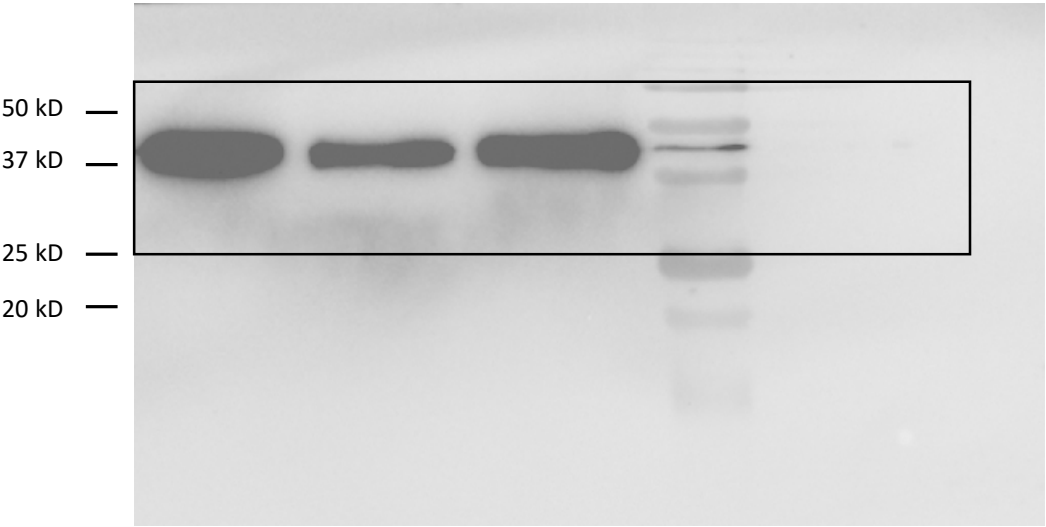

Supplement: Supplementary file 5 [file 1]
