# Supplementary material
Source: publisher figshare collection journal article supplement (https://diabetesjournals.figshare.com/articles/dataset/_/14771181)

**Figure S8.**

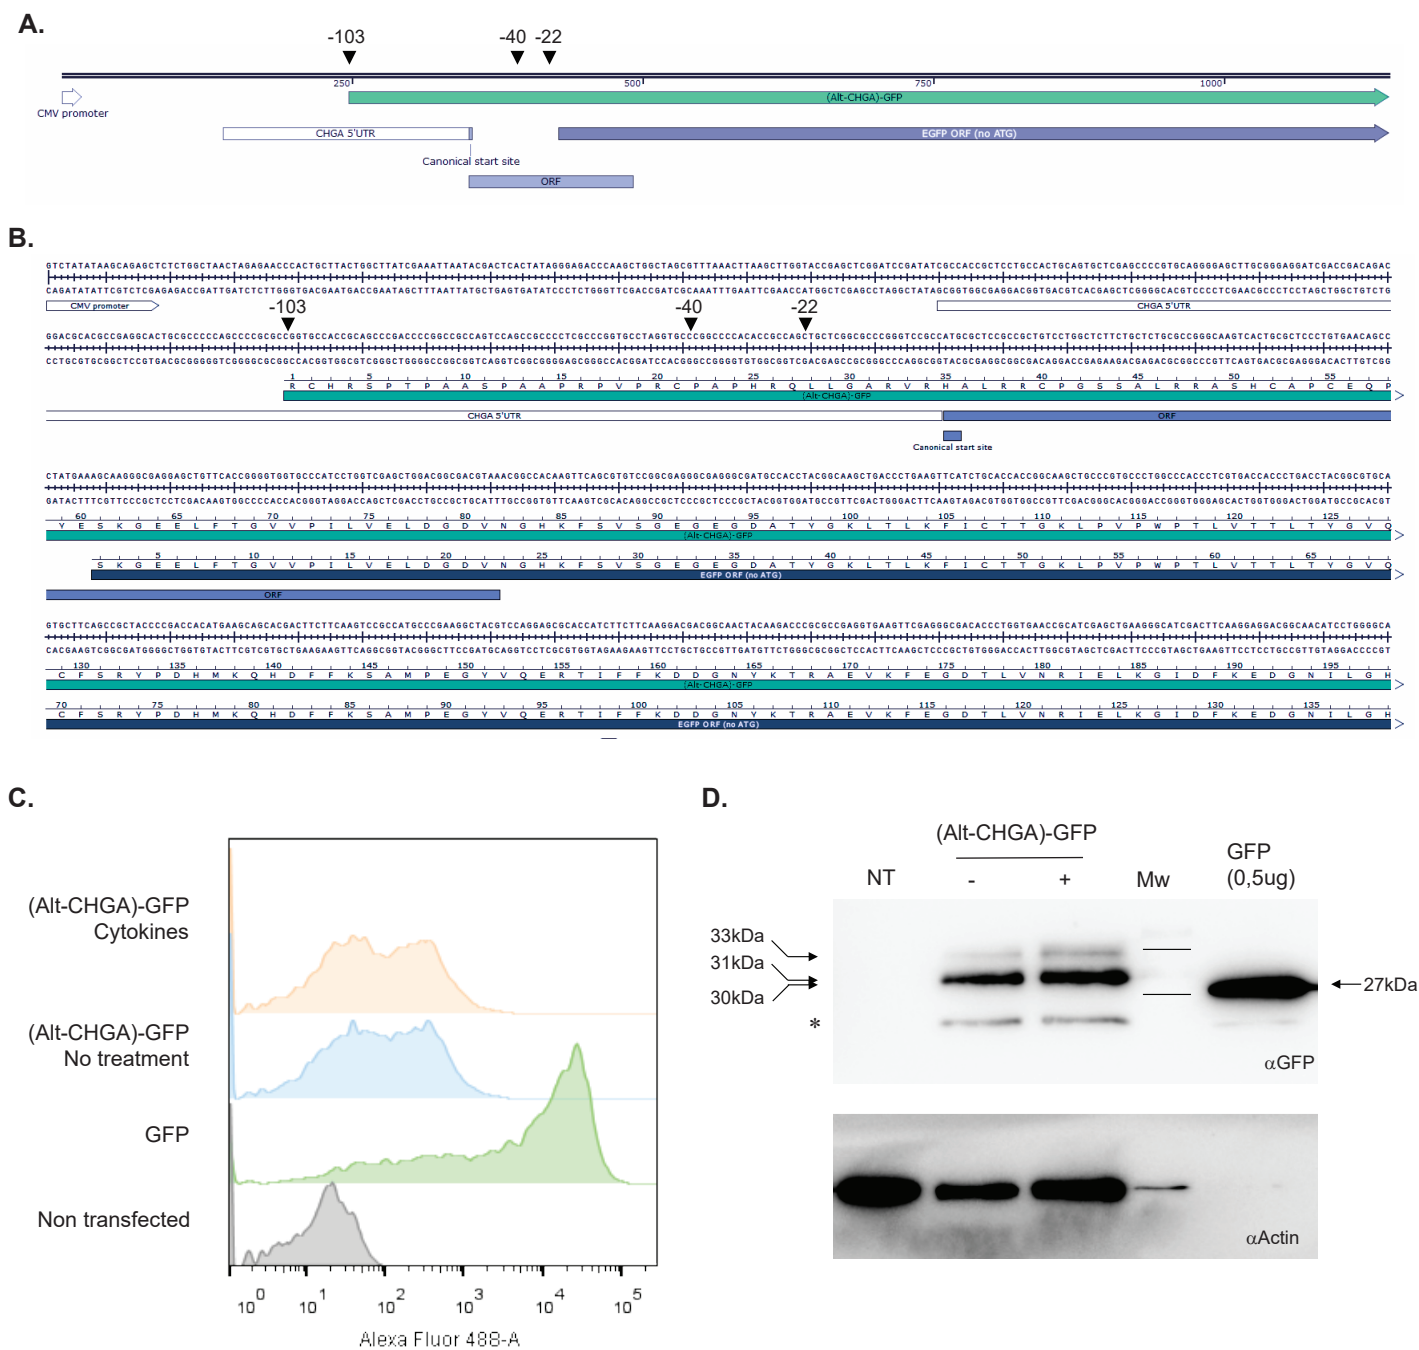

Supplement: Supplementary file 2 [file 1]

Figure S2.

A.

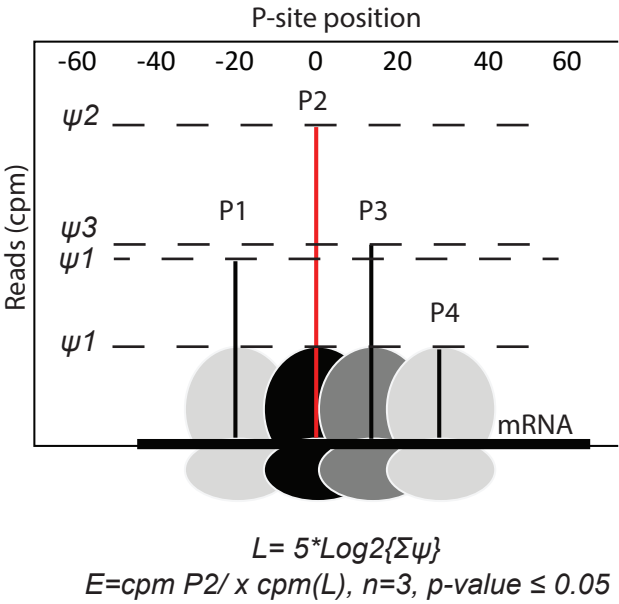

B.

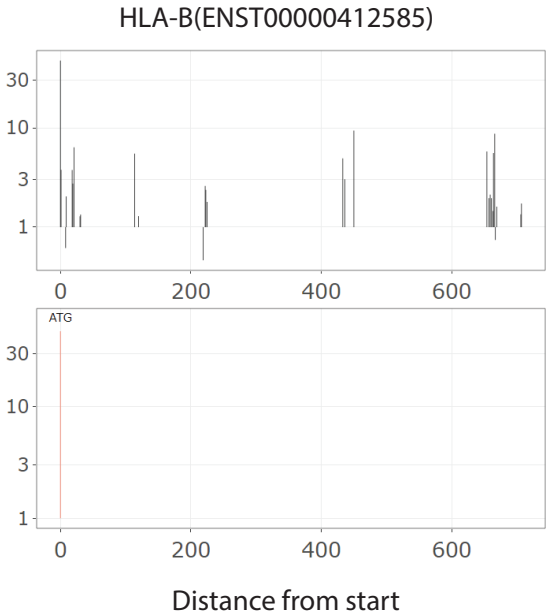

Supplement: Supplementary file 3 [file 1]

Figure S6.

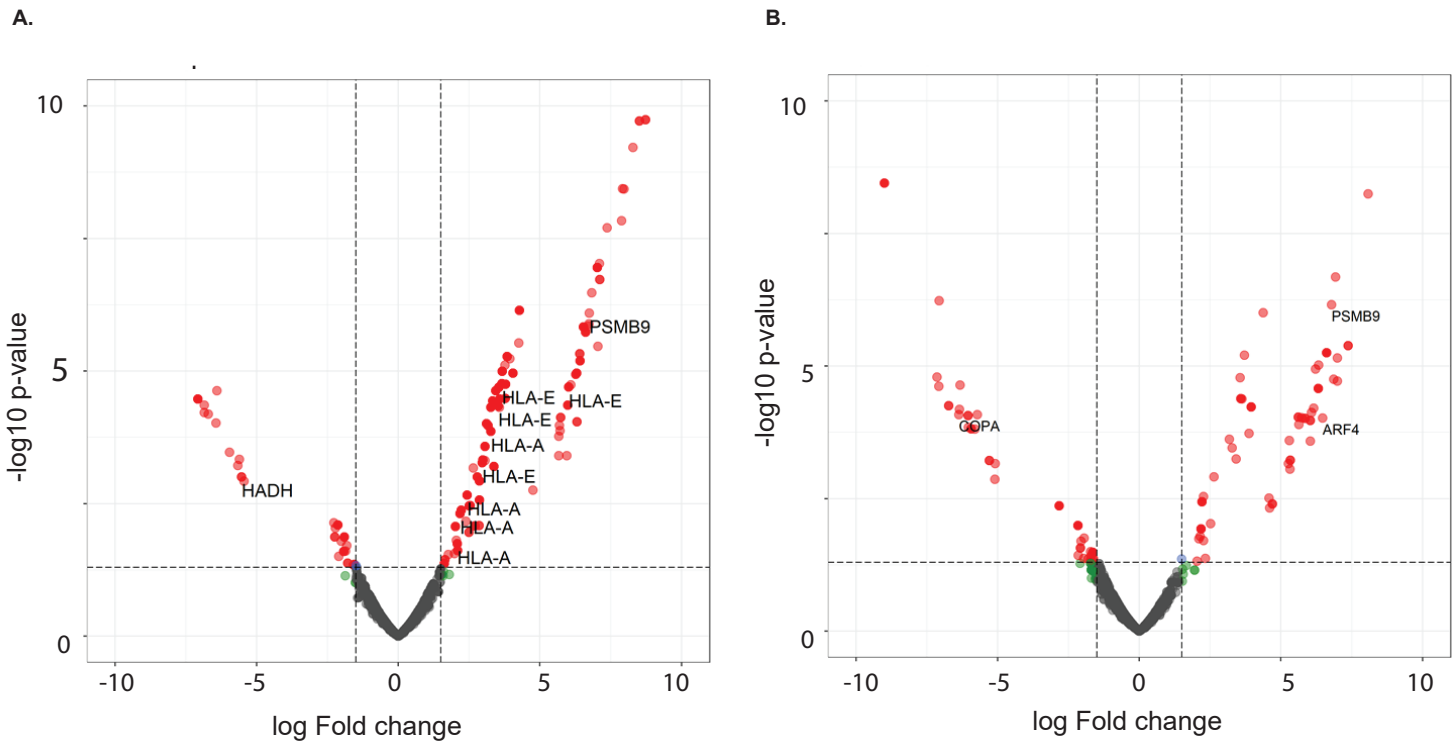

Supplement: Supplementary file 4 [file 1]

Figure s4.

A.

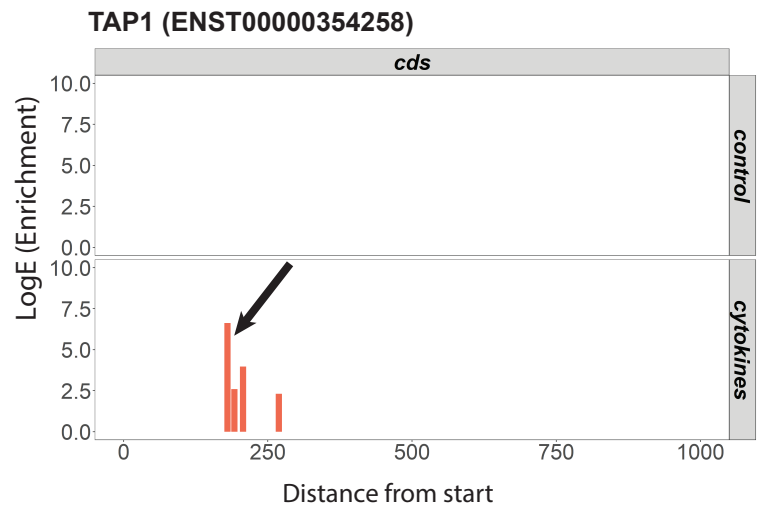

B.

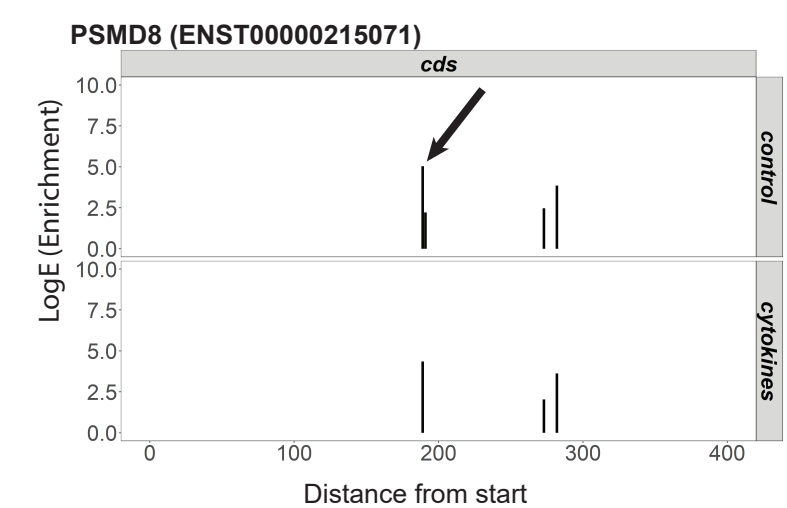

C.

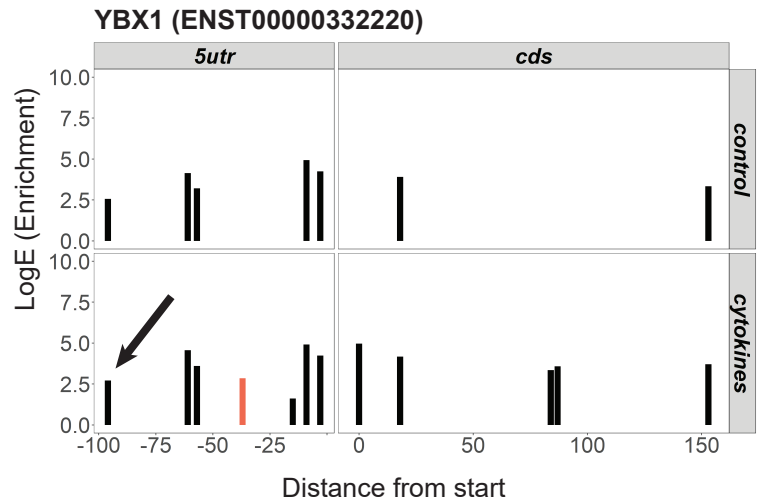

D.

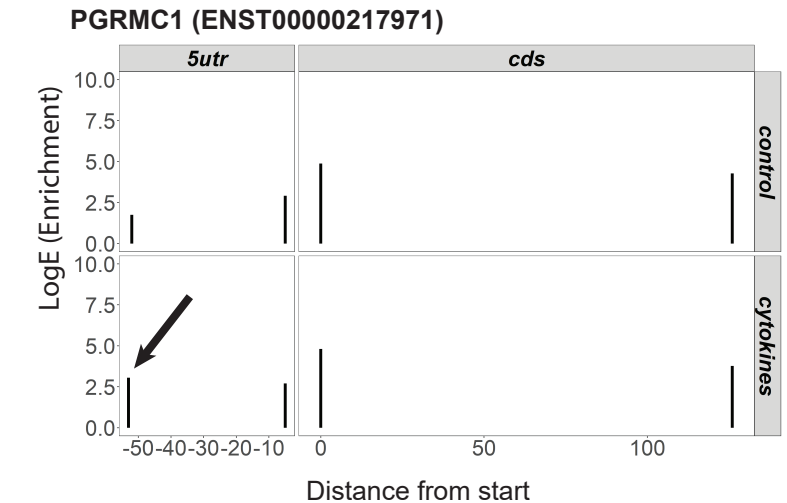

E.

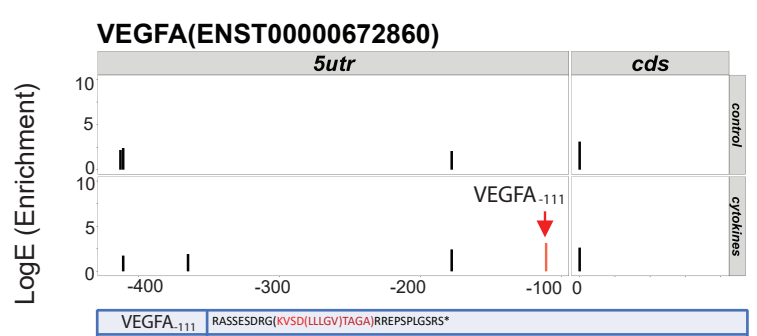

F.

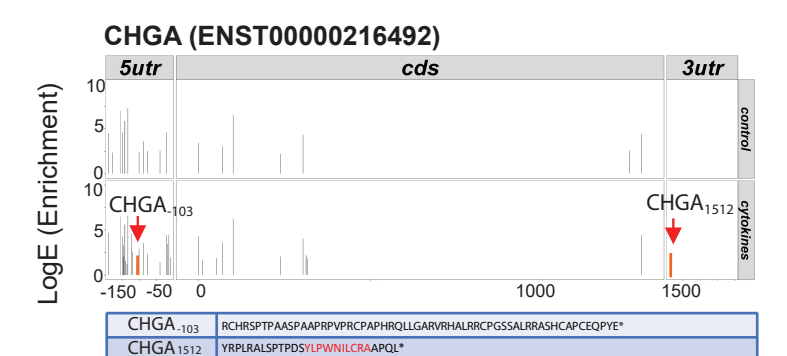

Supplement: Supplementary file 6 [file 1]

Supplementary Figure S5

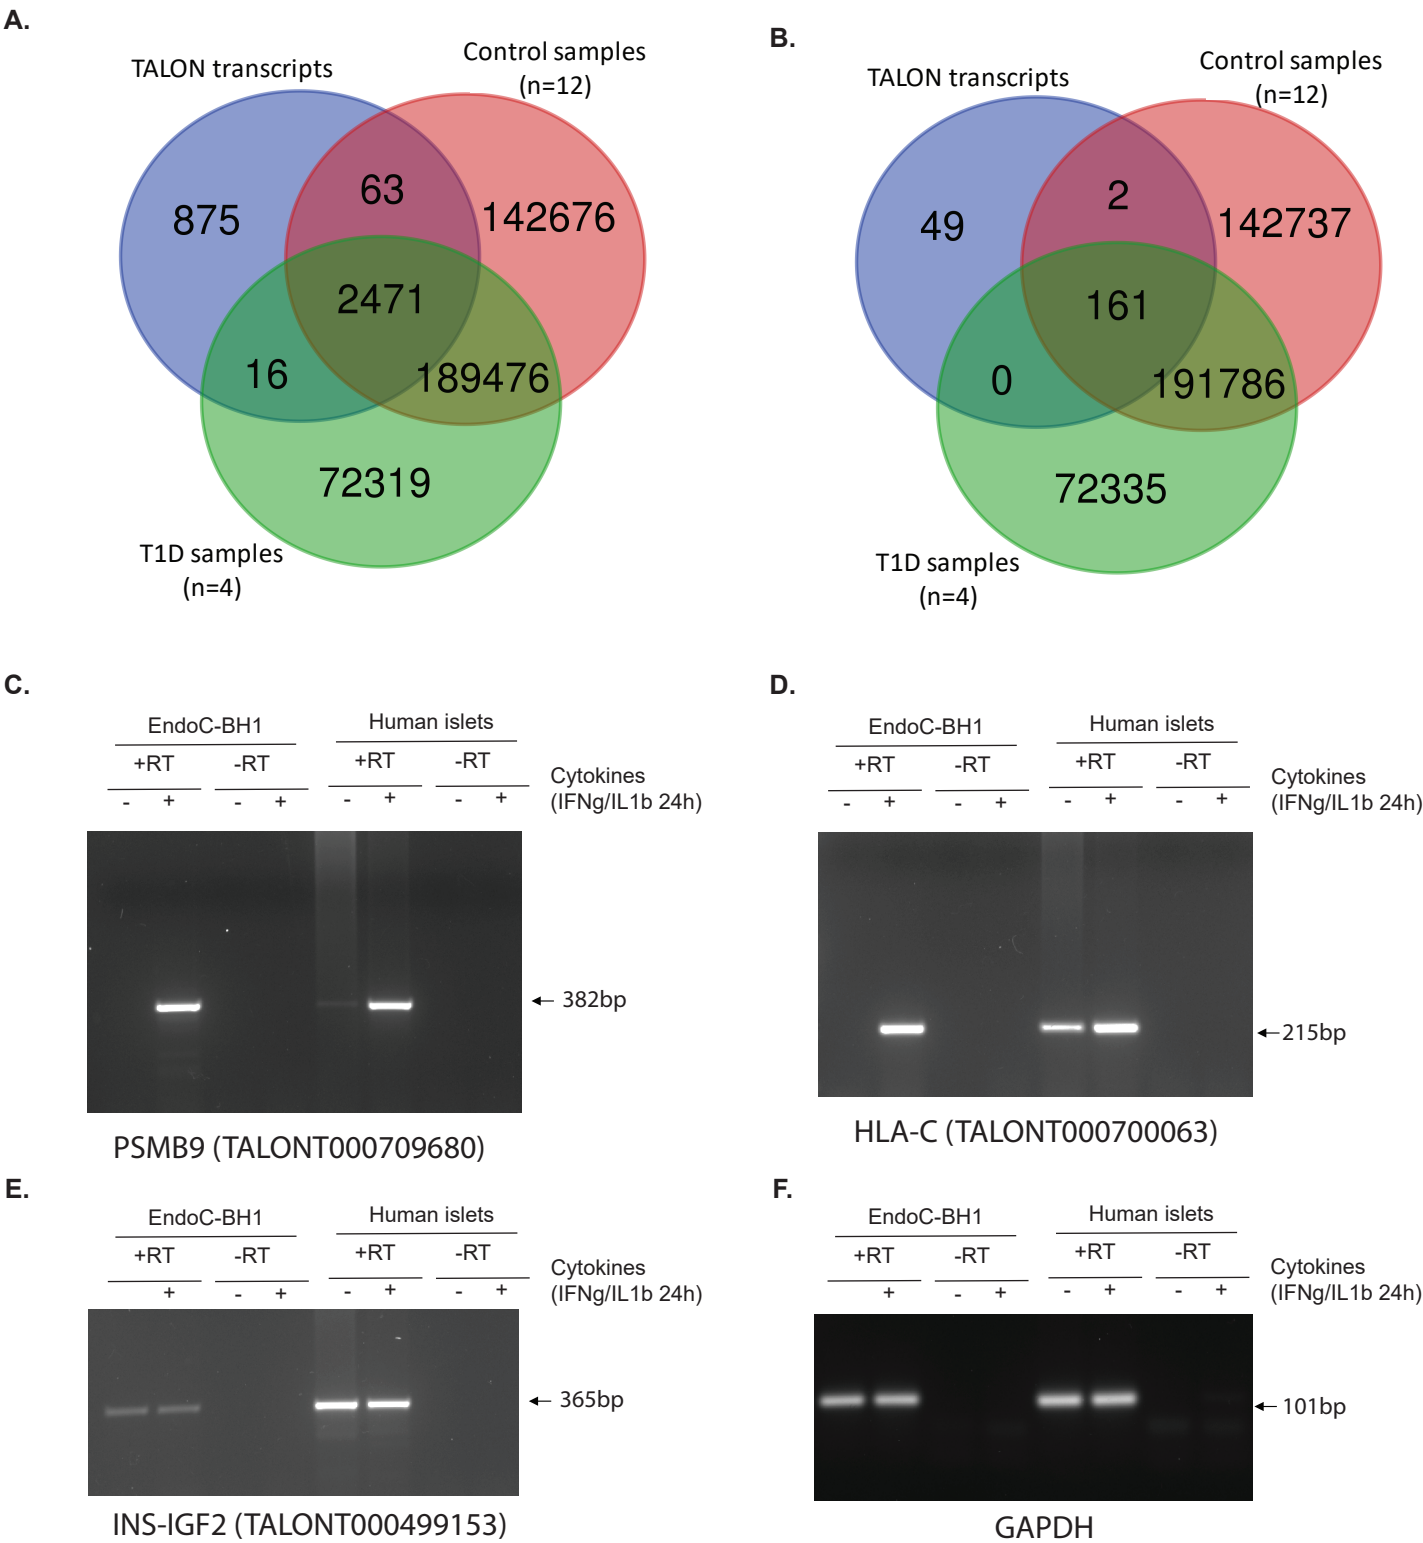

Supplement: Supplementary file 8 [file 1]

Figure S1.

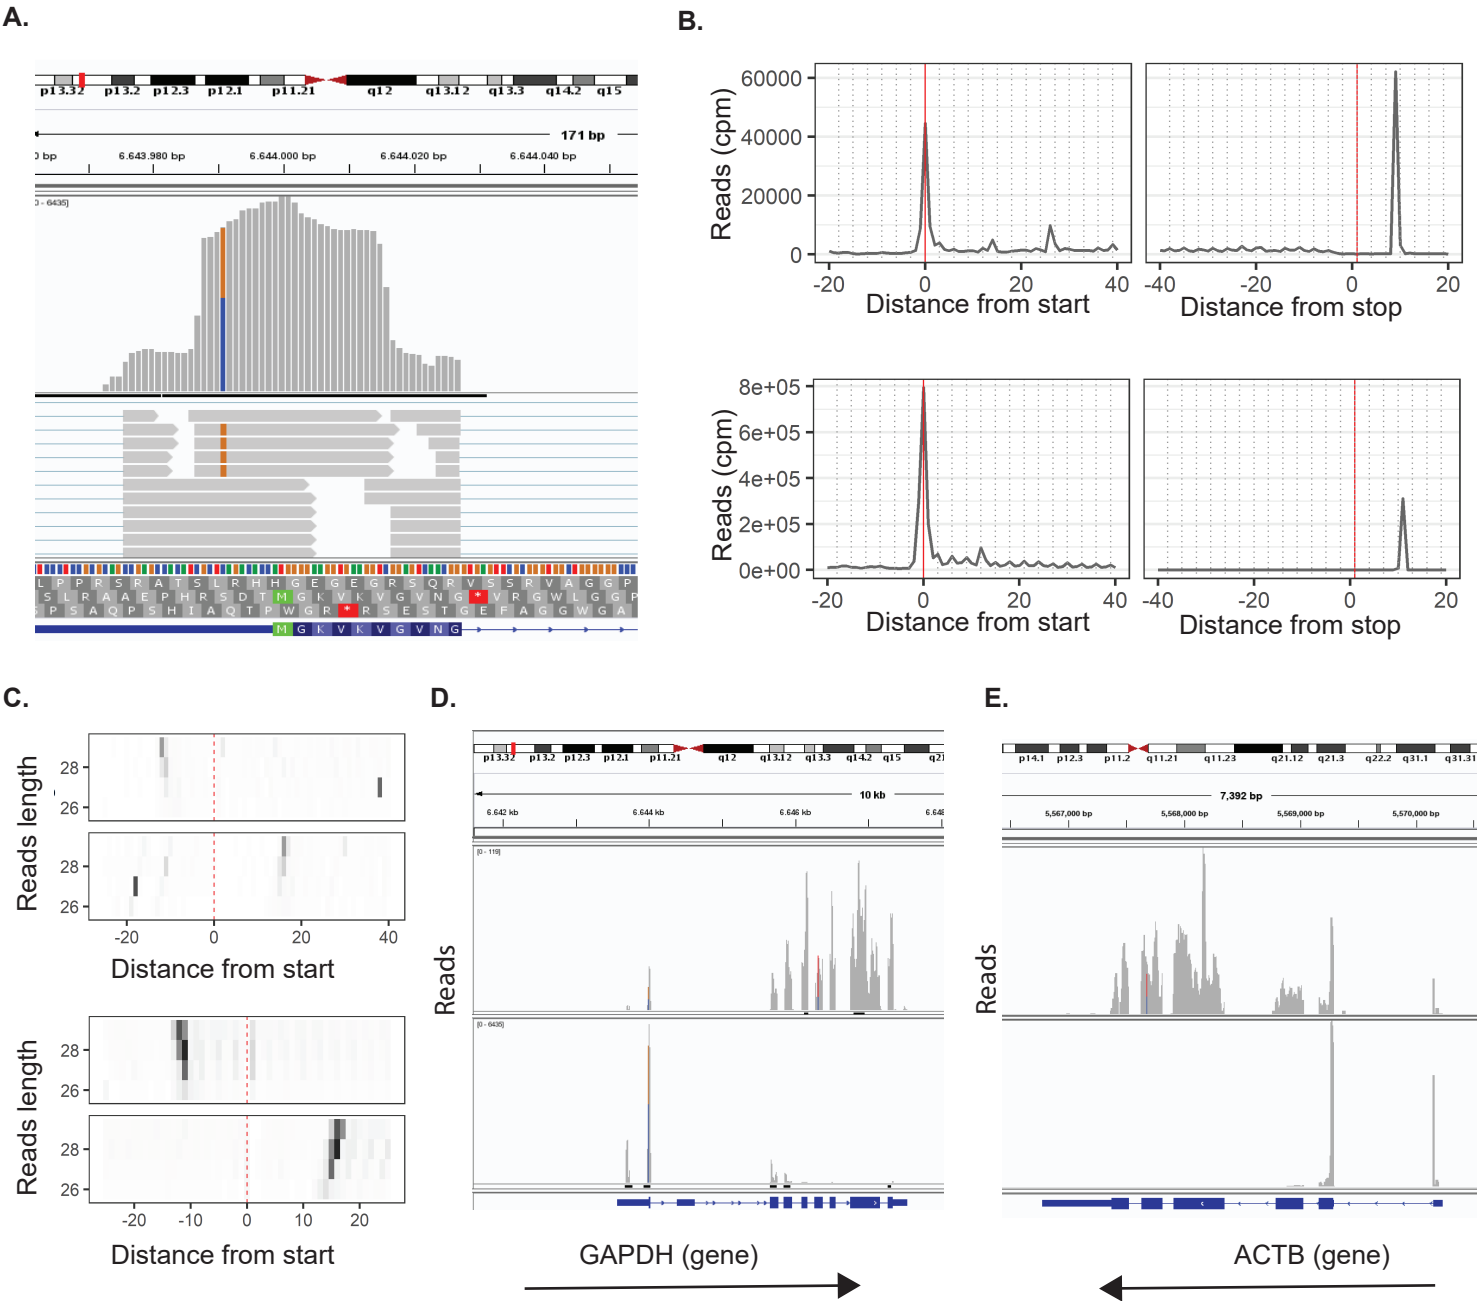

Supplement: Supplementary file 10 [file 1]

Figure S7.

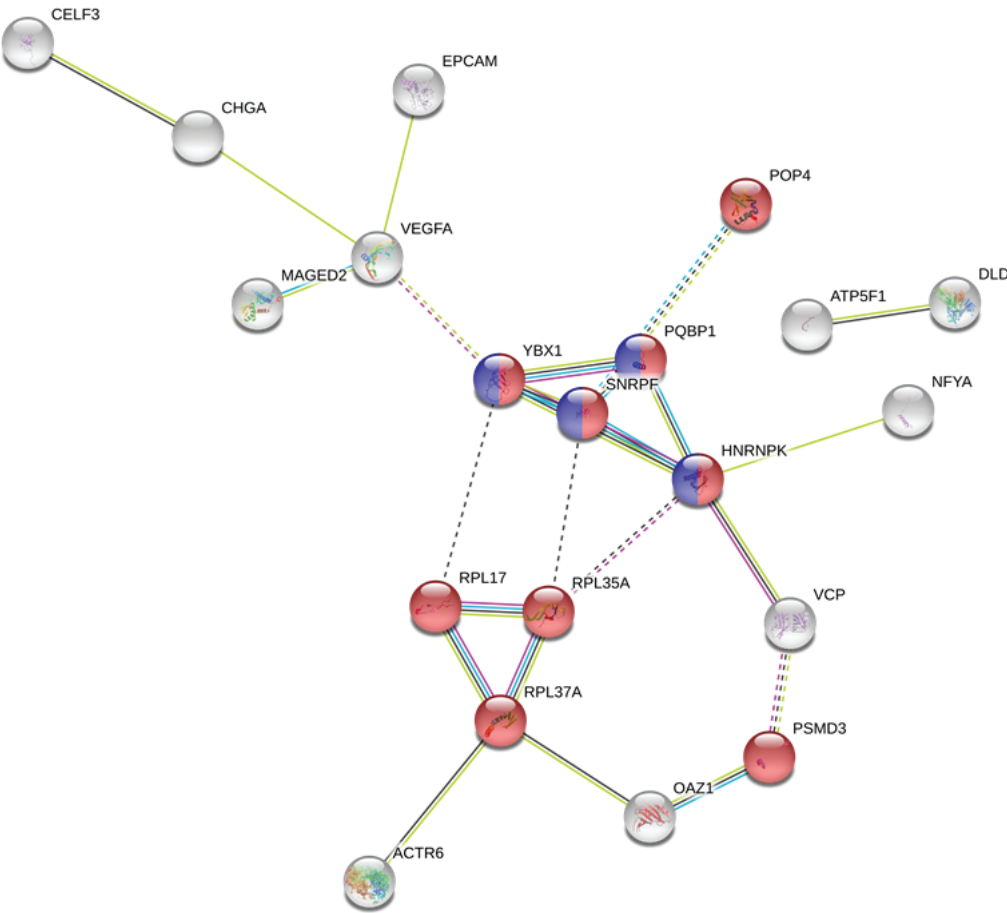

Supplement: Supplementary file 11 [file 1]

Supplementary Figure S3

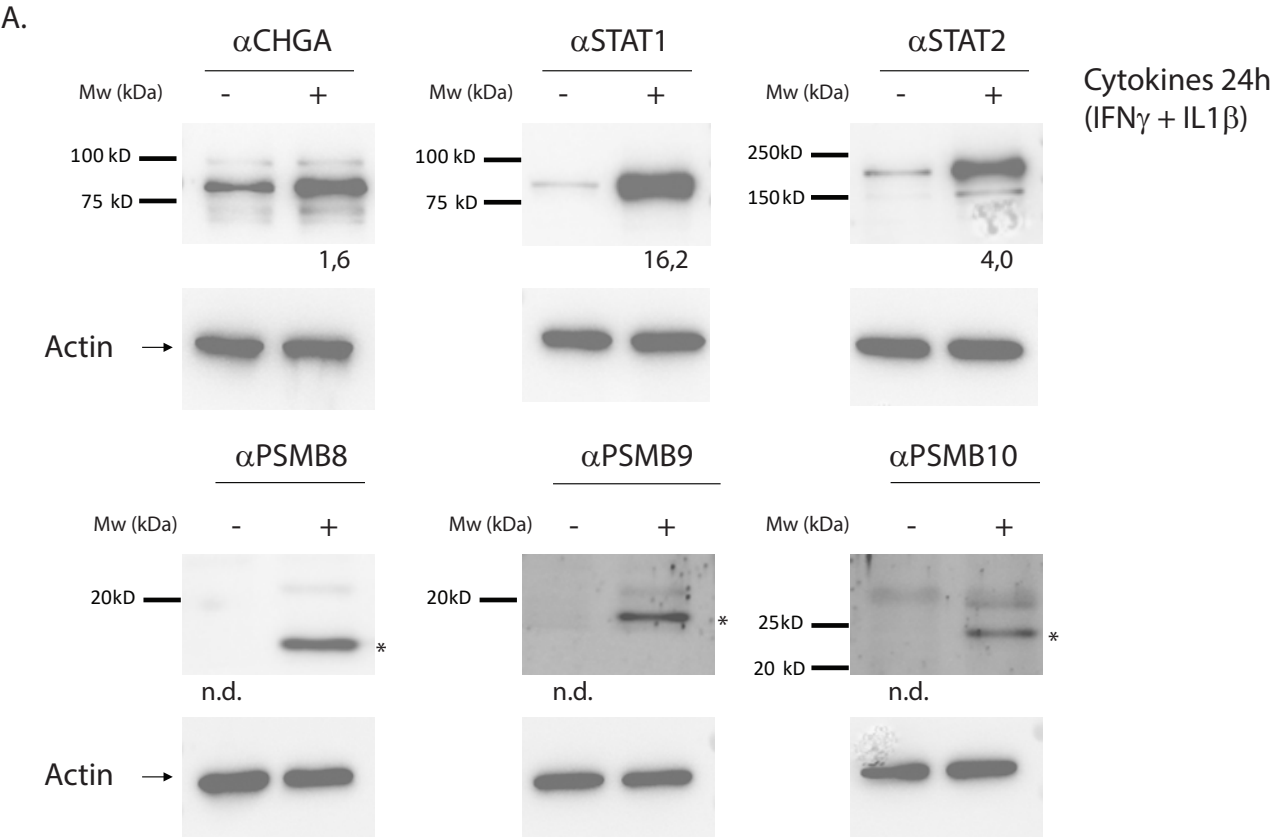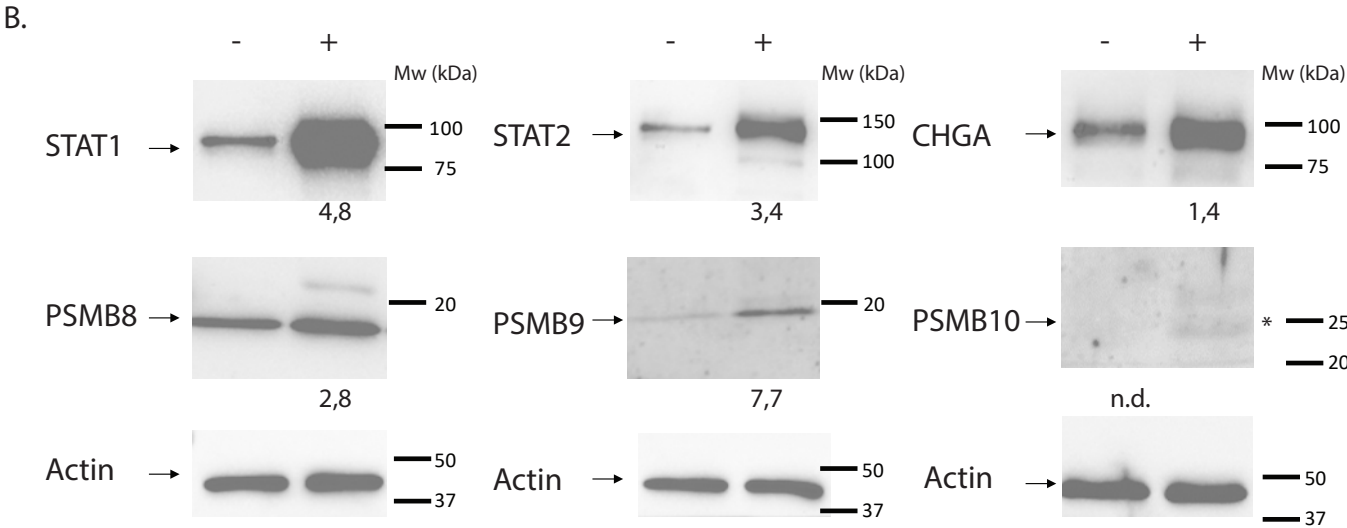

Supplement: Supplementary file 12 [file 1]
